# Supplementary figures and images for: Notch and Ras promote sequential steps of excretory tube development inC. elegans
Source: Oxford University Press journal article supplement (doi:10.1242/dev.068148), 2011-07-20

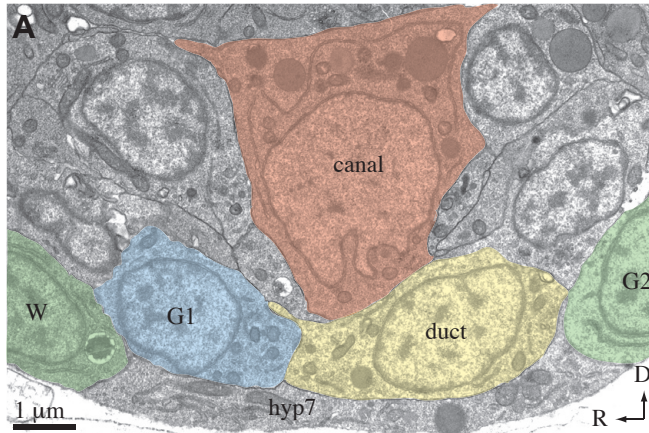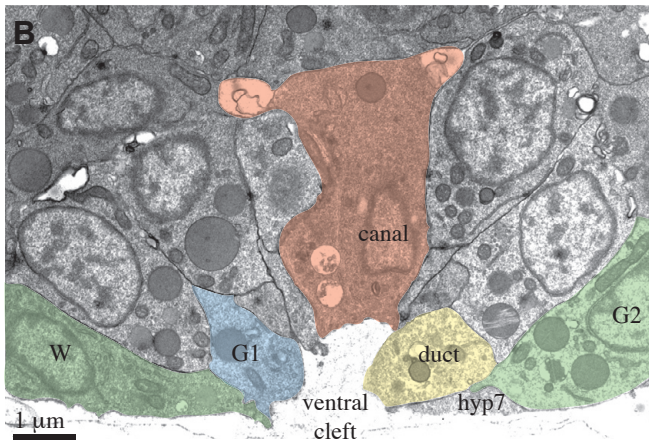

Supplement: dev068148figs1.pdf [file dev068148figs1.pdf]
